# Supplementary material for: Soluble monometallic salen complexes derived from O-functionalised diamines as metalloligands for the synthesis of heterobimetallic complexes
Source: Royal Society of Chemistry journal article supplement (doi:10.1039/b920706f), 2010-01-01
Supplement: b920706f.pdf [file b920706f.pdf]

## Electronic Supplementary Information

for

### Soluble Monometallic Salen Complexes Derived from *O*-functionalised Diamines as Metalloligands for the Synthesis of Heterobimetallic Complexes

Michael Schley, Sebastian Fritzsche, Peter Lönnecke, and Evamarie Hey-Hawkins\*

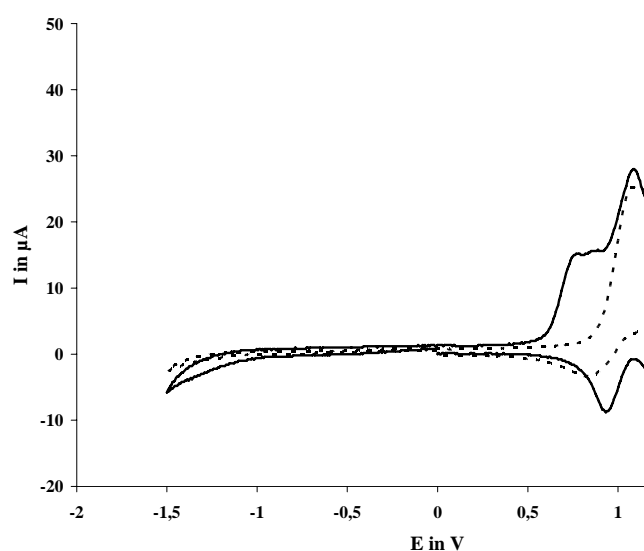

**Figure SI 1** Cyclic voltammogram of the complexes  $[\text{Cu}\{\text{Na}(\text{bsalce})\}]$  (**1b**) (—) and  $[\text{Tp}^* \text{La}\{\text{Cu}(\text{bsalce})\}]$  (**4b**) (---) in dichloromethane.

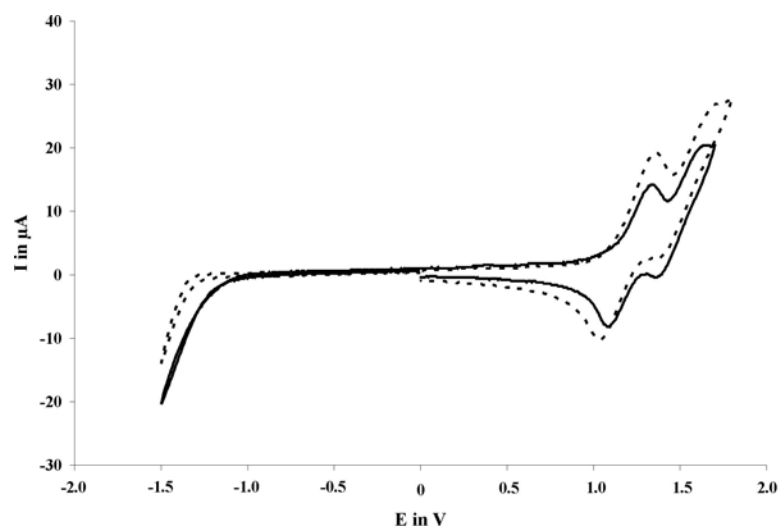

**Figure SI 2** Cyclic voltammogram of the complexes [Ni(Hbsal4cpn)] (**2a**) (—) and [Tp\*<sub>2</sub>La{Ni(bsal4cpn)}] (**5a**) (---) in dichloromethane.

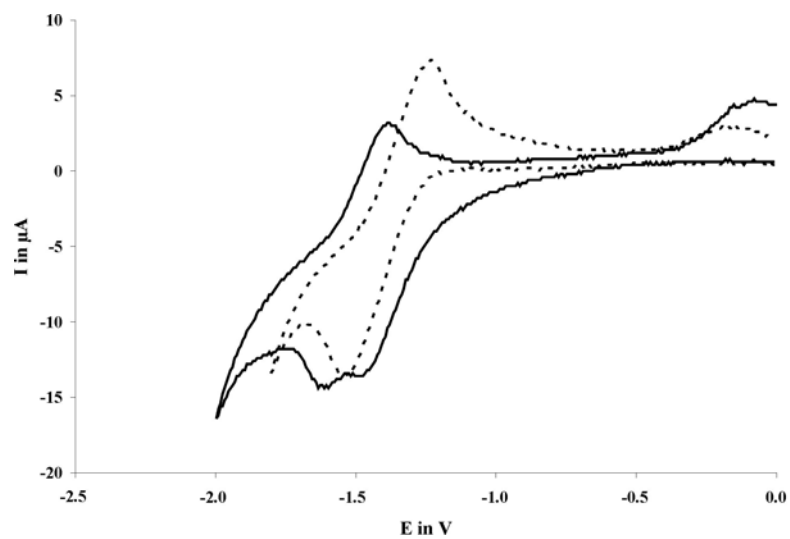

**Figure SI 3** Cyclic voltammogram of the complexes [Ni(Hbsal4cpn)] (**2a**)(—) and [Tp<sup>\*</sup><sub>2</sub>La{Ni(bsal4cpn)}] (---) (**5a**) in thf.
